# Supplementary material for: ABO Genotype, ‘Blood-Type’ Diet and Cardiometabolic Risk Factors
Source: PLOS journal article supplement (doi:10.1371/journal.pone.0084749), 2014-01-15
Supplement: S2 (10.1371/journal.pone.0084749.s002) [file journal.pone.0084749.s002]

# Appendix S1

| Food List          | ABO Blood Group |   |    |   |
|--------------------|-----------------|---|----|---|
|                    | A               | B | AB | O |
| Skim milk          | -               | + | /  | - |
| Milk 1-2%          | -               | + | /  | - |
| Whole milk         | -               | + | -  | - |
| Soy milk           | +               | - | /  | / |
| Flavoured yogurt   | /               | + | +  | - |
| Plain yogurt       | /               | + | +  | - |
| Cottage cheese     | -               | + | +  | - |
| Cream cheese       | -               | / | /  | - |
| Other cheese       | /               | + | +  | / |
| Butter             | -               | / | -  | / |
| Grapes             | /               | + | +  | / |
| Prunes             | +               | / | /  | + |
| Bananas            | -               | + | -  | + |
| Cantaloupe         | /               | / | /  | - |
| Honeydew           | -               | / | /  | - |
| Watermelon         | /               | + | +  | / |
| Avocado            | /               | - | -  | - |
| Apple              | /               | / | /  | / |
| Apple juice        | /               | / | /  | / |
| Orange             | -               | / | -  | - |
| Orange juice       | -               | / | -  | - |
| Grapefruit         | +               | / | +  | / |
| Grapefruit juice   | +               | / | /  | / |
| Other fruit juices | /               | + | +  | / |
| Strawberries       | /               | / | /  | / |
| Blueberries        | +               | / | /  | + |
| Peaches            | /               | / | /  | / |
| Tropical fruits    | -               | + | +  | / |
| Dried apricot      | +               | / | /  | / |
| Raisins            | /               | / | /  | / |
| Dried dates        | /               | / | /  | / |
| Cranberries        | +               | + | +  | / |
| Tomatoes           | -               | - | /  | / |
| Tomato juice       | -               | - | /  | / |
| Tomato sauce       | -               | - | /  | / |
| Tofu               | +               | - | +  | / |
| String beans       | +               | / | /  | / |
| Broccoli           | +               | + | +  | + |
| Cabbage            | -               | + | /  | / |
| Cauliflower        | /               | + | +  | - |
| Brussels Sprouts   | /               | + | /  | / |
| Raw carrots        | +               | + | /  | / |
| Cooked carrots     | +               | + | /  | / |
| Corn               | /               | - | -  | - |
| Peas               | /               | / | /  | / |
| Mixed vegetables   | +               | + | +  | + |
| Beans              | +               | - | /  | - |
| Squash             | /               | / | /  | / |
| Zucchini           | /               | / | /  | / |
| Eggplant           | -               | + | +  | / |
| Yams               | -               | + | +  | / |
| Cooked spinach     | +               | / | /  | + |
| Raw spinach        | +               | / | /  | + |
| Kale               | +               | + | +  | + |
| Iceberg            | /               | / | /  | / |
| Romaine lettuce    | +               | / | /  | + |
| Celery             | +               | / | +  | / |
| Green peppers      | -               | + | -  | / |
| Red peppers        | -               | + | -  | + |
| Onions (Garnish)   | +               | / | /  | + |

|                             |   |   |   |   |
|-----------------------------|---|---|---|---|
| Onions                      | + | / | / | + |
| Okra                        | + | / | / | + |
| Cucumber                    | / | / | + | - |
| Olives                      | - | - | - | - |
| Beets                       | / | + | + | / |
| Asparagus                   | / | / | / | / |
| Egg whites                  | / | / | / | / |
| Eggs                        | / | / | / | / |
| Bacon                       | - | - | - | - |
| Chicken sandwich            | / | - | - | / |
| Chicken/Turkey with skin    | / | - | - | / |
| Chicken/Turkey without skin | / | - | - | / |
| Hotdogs                     | - | / | - | + |
| Chicken/Turkey hotdogs      | / | - | - | / |
| Processed meat sandwich     | - | / | - | + |
| Processed meat              | - | / | - | + |
| Lean hamburger              | - | / | - | + |
| Hamburger                   | - | / | - | + |
| Sandwich                    | - | / | - | + |
| Pork                        | - | - | - | - |
| Beef                        | - | / | - | + |
| Liver                       | - | / | / | + |
| Chicken liver               | / | - | - | / |
| Other organ meats           | - | / | - | + |
| Canned tuna                 | / | / | + | / |
| Fish cakes                  | + | + | + | + |
| Shrimp                      | - | - | - | / |
| Dark meat fish              | + | + | + | / |
| Other fish                  | + | + | + | + |
| Cold cereal                 | / | - | / | - |
| Cooked oatmeal              | + | + | + | / |
| Cooked oat bran             | + | + | + | / |
| Cooked breakfast cereal     | / | - | - | - |
| White bread                 | / | / | / | - |
| Muffins                     | - | / | / | - |
| Heavy bread                 | + | - | + | / |
| Dark bread                  | / | - | / | / |
| Bagel                       | / | / | / | - |
| Biscuits                    | / | / | / | - |
| Brown rice                  | / | / | + | / |
| White rice                  | / | / | + | / |
| Mac & cheese                | / | / | / | - |
| Pasta                       | / | / | / | - |
| Whole grain pasta           | - | - | / | - |
| Barley                      | / | / | / | - |
| Bulgur                      | / | - | / | - |
| Other grains                | / | / | / | - |
| Pancakes                    | / | / | / | - |
| French fries                | - | / | / | - |
| Potatoes (scaloped)         | - | / | / | - |
| Potatoes (baked)            | - | / | / | - |
| Potato chips                | - | / | / | - |
| Corn chips                  | / | - | - | - |
| Crackers                    | / | / | / | - |
| Pizza                       | / | / | / | - |
| Tortillas                   | / | / | / | - |
